# Supplementary material for: Protein interaction and functional data indicate MTHFD2 involvement in RNA processing and translation
Source: PubMed Central journal article supplement (PMC6158883; doi:10.1186/s40170-018-0185-4), 2018-09-27

**A**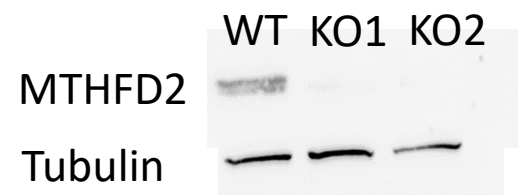**B**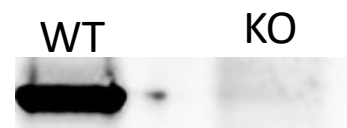**C**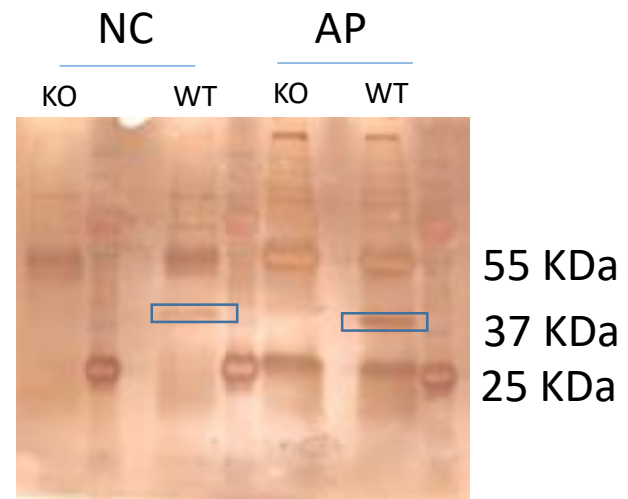

Supplement: 40170_2018_185_MOESM2_ESM.pdf [file 40170_2018_185_MOESM2_ESM.pdf]
